# Supplementary material for: Construction and Application of Graphene Oxide-Bovine Serum Albumin Modified Extended Gate Field Effect Transistor Chiral Sensor
Source: MDPI journal article supplement (doi:10.3390/s21113921), 2021-06-07
Supplement: s1 [file s1]

**Supplementary Materials**

**Construction and Application of Graphene  
Oxide-Bovine Serum Albumin Modified Extended  
Gate Field Effect Transistor Chiral Sensor**

Le Li <sup>1</sup>, Xiaofei Ma <sup>1, \*</sup>, Yin Xiao <sup>2</sup> and Yong Wang <sup>1, \*</sup>

<sup>1</sup> Tianjin Key Laboratory of Molecular Optoelectronic Science, Department of Chemistry, School of Science, Tianjin University, Tianjin 300072, China; ll17865181937@163.com

<sup>2</sup> School of Chemical Engineering and Technology, Tianjin Engineering Research Center of Functional Fine Chemicals, Tianjin University, Tianjin 300072, China; xiaoyin@tju.edu.cn

\* Correspondence: maxiaofei@tju.edu.cn (X.M.); wangyongtju@tju.edu.cn (Y.W.)

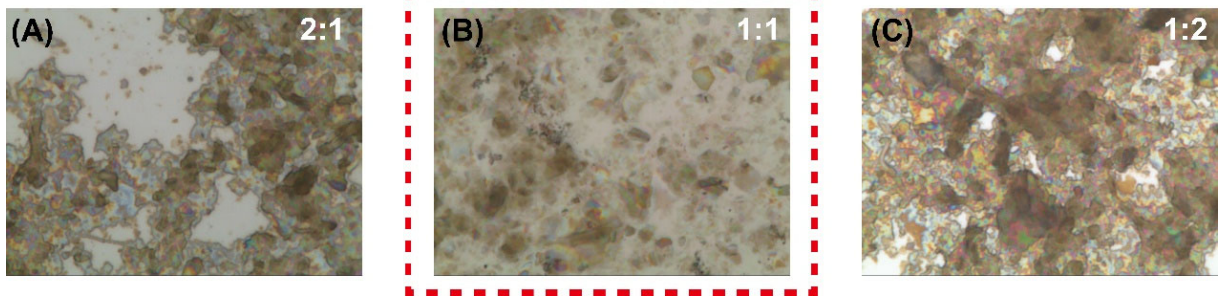

Figure S1. Optical microscope morphology of Nafion-GO@BSA film on gold surface with doping ratio of 2:1 (A), 1:1 (B) and 1:2 (C) (same volume).

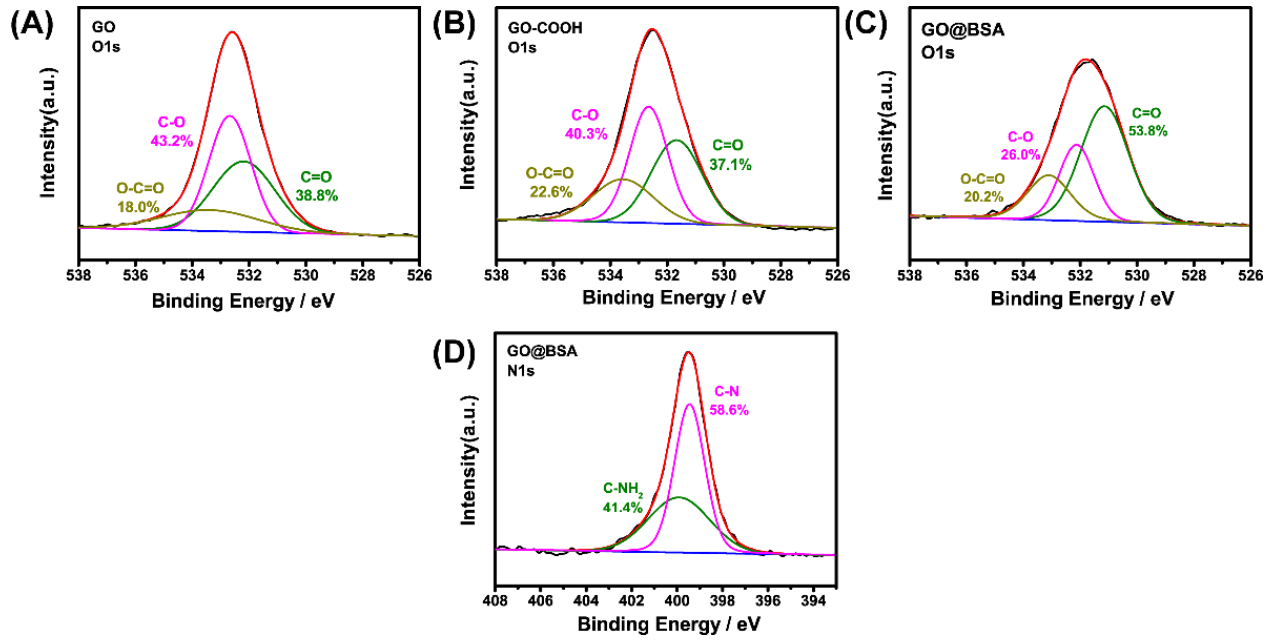

Figure S2. O1s region of the XPS spectra of (A) GO, (B) GO-COOH, (C) GO@BSA and N1s region of (D) GO@BSA

Table S1. Summary table of peak separation results of O and N elements of each substance.

|         | O     |       |       | N     |                   |
|---------|-------|-------|-------|-------|-------------------|
|         | C=O   | C-O   | O=C-O | C-N   | C-NH <sub>2</sub> |
| GO      | 38.8% | 43.2% | 18.0% | —     | —                 |
| GO-COOH | 37.1% | 40.3% | 22.6% | —     | —                 |
| GO@BSA  | 53.8% | 26.0% | 20.2% | 58.6% | 41.4%             |

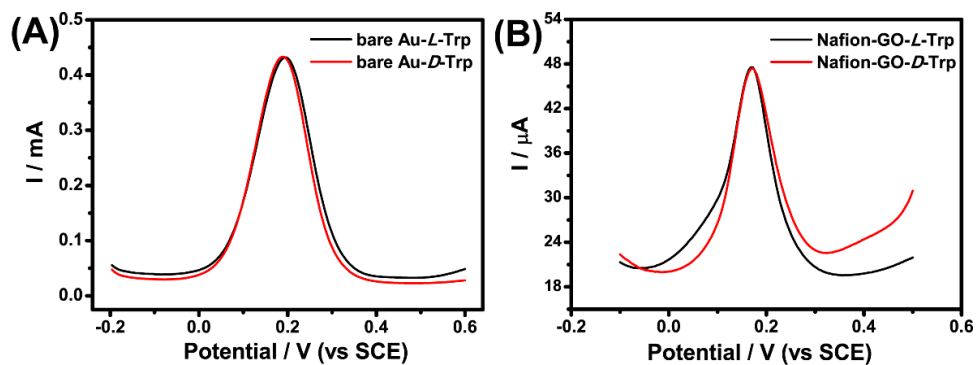

Figure S3. Differential pulse voltammograms of 5 mM *L*- and *D*-Trp combined with bare gold electrode (A) and Nafion-GO-EG (B) in 0.1 M KCl containing 5 mM  $[\text{Fe}(\text{CN})_6]^{3-/4-}$  of pH 7.

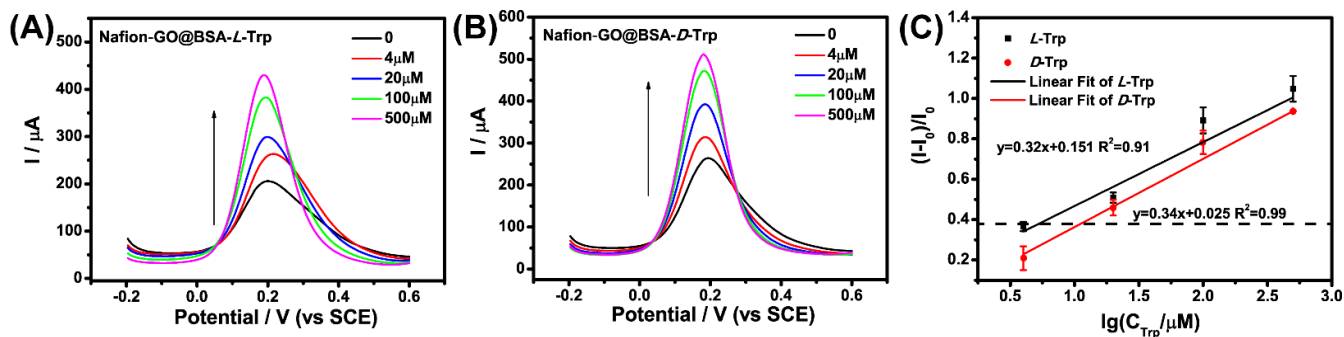

Figure S4. Differential pulse voltammograms of *L*-Trp (A) or *D*-Trp (B) in the range of 4  $\mu$ M ~ 500  $\mu$ M and calibration plot of peak current versus logarithmic concentration of Trp isomers (C).

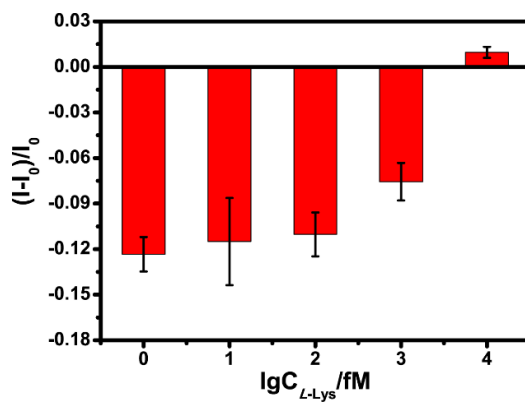

Figure S5. Non-real time detection of *L*-Lys by Nafion-GO@BSA-EG-MOSFET.
